# Supplementary material for: Classifying deep eutectic solvents for polymer solvation via intramolecular dimer formation
Source: Royal Society of Chemistry journal article supplement (doi:10.1039/d2cp03114k), 2022-01-01
Supplement: d2cp03114k1.pdf [file d2cp03114k1.pdf]

## **Electronic Supplementary Information (ESI)**

### **Classifying deep eutectic solvents for polymer solvation *via* intramolecular dimer formation**

Shreya Juneja and Siddharth Pandey\*

Department of Chemistry, Indian Institute of Technology Delhi, Hauz Khas, New Delhi,  
110016, India.

\*Corresponding Authors: sipandey@chemistry.iitd.ac.in

## Table of Contents

|          | Page No. |
|----------|----------|
| Table S1 | S3       |
| Table S2 | S4       |
| Table S3 | S6       |
| Fig. S1  | S9       |
| Fig. S2  | S10      |
| Fig. S3  | S11      |
| Fig. S4  | S12      |
| Fig. S5  | S13      |

**Table S1:** Excimer-to-monomer emission intensity ratios ( $I_E/I_M$ ) at varying concentrations of Py-PDMS-Py dissolved in DESs ChCl:Gly and ChCl:Urea, glycerol (Gly) and PDMS2000 at 293.15 K. The relative error associated with  $I_E/I_M$  ratios is  $\leq \pm 5\%$ .

| <b>[Py-PDMS-Py]/<math>\mu</math>M</b> | <b><math>I_E/I_M</math></b> |
|---------------------------------------|-----------------------------|
| <b>ChCl:Gly</b>                       |                             |
| 0.1                                   | 0.25                        |
| 1.0                                   | 0.24                        |
| 5.0                                   | 0.25                        |
| 10.0                                  | 0.25                        |
| 25.0                                  | 0.24                        |
| 50.0                                  | 0.25                        |
| <b>ChCl:Urea</b>                      |                             |
| 0.1                                   | 0.81                        |
| 1.0                                   | 0.78                        |
| 5.0                                   | 0.81                        |
| 10.0                                  | 0.79                        |
| 25.0                                  | 0.79                        |
| 50.0                                  | 0.78                        |
| <b>Gly</b>                            |                             |
| 0.1                                   | 0.47                        |
| 1.0                                   | 0.48                        |
| 5.0                                   | 0.49                        |
| 10.0                                  | 0.48                        |
| 25.0                                  | 0.47                        |
| 50.0                                  | 0.47                        |
| <b>PDMS2000</b>                       |                             |
| 0.1                                   | 0.52                        |
| 1.0                                   | 0.53                        |
| 5.0                                   | 0.52                        |
| 10.0                                  | 0.51                        |
| 25.0                                  | 0.50                        |
| 50.0                                  | 0.50                        |

**Table S2:** Recovered excited-state intensity decay parameters for 1-MePy (10  $\mu$ M; excitation with 340 nm NanoLED) dissolved in DESs ChCl:Gly and ChCl:Urea, glycerol (Gly) and PDMS2000 at different temperatures. Errors associated with decay times are  $\leq \pm 5\%$ .

| Temperature (K)  | $\lambda_{em}$ (nm) | $\tau$ /ns | $\chi^2$ |
|------------------|---------------------|------------|----------|
| <b>ChCl:Gly</b>  |                     |            |          |
| 293.15           | 377                 | 103.7      | 1.18     |
| 303.15           | 377                 | 100.3      | 1.21     |
| 313.15           | 377                 | 98.8       | 1.26     |
| 323.15           | 377                 | 96.0       | 1.15     |
| 333.15           | 377                 | 94.0       | 1.13     |
| 343.15           | 377                 | 92.5       | 1.19     |
| 353.15           | 377                 | 90.2       | 1.08     |
| 363.15           | 377                 | 87.2       | 1.10     |
| <b>ChCl:Urea</b> |                     |            |          |
| 293.15           | 377                 | 90.8       | 1.08     |
| 303.15           | 377                 | 88.5       | 1.13     |
| 313.15           | 377                 | 86.0       | 1.21     |
| 323.15           | 377                 | 85.7       | 1.22     |
| 333.15           | 377                 | 83.4       | 1.07     |
| 343.15           | 377                 | 81.9       | 1.24     |
| 353.15           | 377                 | 78.9       | 1.13     |
| 363.15           | 377                 | 76.8       | 1.20     |
| <b>Gly</b>       |                     |            |          |
| 293.15           | 377                 | 131.6      | 1.21     |
| 303.15           | 377                 | 128.2      | 1.25     |

|        |                 |       |      |
|--------|-----------------|-------|------|
| 313.15 | 377             | 125.8 | 1.32 |
| 323.15 | 377             | 121.7 | 1.27 |
| 333.15 | 377             | 118.2 | 1.22 |
| 343.15 | 377             | 115.3 | 1.43 |
| 353.15 | 377             | 111.6 | 1.33 |
| 363.15 | 377             | 107.5 | 1.38 |
|        | <b>PDMS2000</b> |       |      |
| 293.15 | 377             | 26.4  | 1.14 |
| 303.15 | 377             | 23.0  | 1.13 |
| 313.15 | 377             | 20.6  | 1.06 |
| 323.15 | 377             | 18.3  | 1.26 |
| 333.15 | 377             | 16.3  | 1.39 |
| 343.15 | 377             | 15.0  | 1.13 |
| 353.15 | 377             | 13.9  | 1.12 |
| 363.15 | 377             | 12.6  | 1.19 |

---

**Table S3:** Recovered excited-state intensity decay parameters for Py-PDMS-Py (10  $\mu$ M; excitation with 340 nm NanoLED) dissolved in DESs ChCl:Gly and ChCl:Urea, glycerol (Gly) and PDMS2000 at different temperatures obtained *via* global fitting strategy. Errors associated with decay times are  $\leq \pm 5\%$ .

| Temperature (K) | $\lambda_{em}$ (nm) | $\tau_1$ /ns ( $\alpha_1$ ) | $\tau_2$ /ns ( $\alpha_2$ ) | $\chi^2$ |
|-----------------|---------------------|-----------------------------|-----------------------------|----------|
| <b>ChCl:Gly</b> |                     |                             |                             |          |
| 293.15          | 377                 | 26.8 (0.17)                 | 115.6 (0.83)                | 1.67     |
|                 | 480                 | 26.8 (0.97)                 | 115.6 (0.03)                | 1.57     |
| 303.15          | 377                 | 25.9 (0.16)                 | 113.3 (0.84)                | 1.52     |
|                 | 480                 | 25.9 (0.97)                 | 113.3 (0.03)                | 1.80     |
| 313.15          | 377                 | 23.9 (0.16)                 | 110.2 (0.84)                | 1.61     |
|                 | 480                 | 23.9 (0.97)                 | 110.2 (0.03)                | 1.54     |
| 323.15          | 377                 | 22.3 (0.17)                 | 107.4 (0.83)                | 1.69     |
|                 | 480                 | 22.3 (0.98)                 | 107.4 (0.02)                | 1.50     |
| 333.15          | 377                 | 20.8 (0.18)                 | 104.3 (0.82)                | 1.62     |
|                 | 480                 | 20.8 (0.98)                 | 104.3 (0.02)                | 1.62     |
| 343.15          | 377                 | 19.2 (0.18)                 | 101.6 (0.82)                | 1.60     |
|                 | 480                 | 19.2 (0.98)                 | 101.6 (0.02)                | 1.63     |
| 353.15          | 377                 | 17.6 (0.18)                 | 99.2 (0.82)                 | 1.43     |
|                 | 480                 | 17.6 (0.98)                 | 99.2 (0.02)                 | 1.63     |
| 363.15          | 377                 | 16.4 (0.18)                 | 95.4 (0.82)                 | 1.49     |
|                 | 480                 | 16.4 (0.99)                 | 95.4 (0.01)                 | 1.64     |

**ChCl:Urea**

|        |     |             |              |      |
|--------|-----|-------------|--------------|------|
| 293.15 | 377 | 35.4 (0.20) | 100.2 (0.80) | 2.22 |
|        | 480 | 35.4 (0.98) | 100.2 (0.02) | 1.31 |
| 303.15 | 377 | 32.7 (0.19) | 97.4 (0.81)  | 2.16 |
|        | 480 | 32.7 (0.98) | 97.4 (0.02)  | 1.34 |
| 313.15 | 377 | 30.1 (0.18) | 95.7 (0.82)  | 2.09 |
|        | 480 | 30.1 (0.99) | 95.7 (0.01)  | 1.25 |
| 323.15 | 377 | 27.4 (0.17) | 93.2 (0.83)  | 2.04 |
|        | 480 | 27.4 (0.99) | 93.2 (0.01)  | 1.37 |
| 333.15 | 377 | 24.3 (0.18) | 90.5 (0.82)  | 2.43 |
|        | 480 | 24.3 (0.99) | 90.5 (0.01)  | 1.23 |
| 343.15 | 377 | 22.1 (0.17) | 88.4 (0.83)  | 2.18 |
|        | 480 | 22.1 (0.99) | 88.4 (0.01)  | 1.29 |
| 353.15 | 377 | 19.7 (0.17) | 85.4 (0.83)  | 2.18 |
|        | 480 | 19.7 (0.99) | 85.4 (0.01)  | 1.29 |
| 363.15 | 377 | 17.5 (0.20) | 83.1 (0.80)  | 2.11 |
|        | 480 | 17.5 (0.99) | 83.1 (0.01)  | 1.27 |

**Gly**

|        |     |             |              |      |
|--------|-----|-------------|--------------|------|
| 293.15 | 377 | 51.9 (0.35) | 165.0 (0.65) | 2.66 |
|        | 480 | 51.9 (1.00) | 165.0 (0.00) | 1.78 |
| 303.15 | 377 | 48.9 (0.34) | 160.1 (0.66) | 2.47 |
|        | 480 | 48.9 (1.00) | 160.1 (0.00) | 1.58 |
| 313.15 | 377 | 45.6 (0.32) | 154.4 (0.68) | 2.38 |
|        | 480 | 45.6 (1.00) | 154.4 (0.00) | 1.49 |
| 323.15 | 377 | 42.2 (0.29) | 148.2 (0.71) | 2.27 |
|        | 480 | 42.2 (1.00) | 148.2 (0.00) | 1.36 |

|        |     |                 |              |      |
|--------|-----|-----------------|--------------|------|
| 333.15 | 377 | 38.4 (0.28)     | 142.7 (0.72) | 2.18 |
|        | 480 | 38.4 (1.00)     | 142.7 (0.00) | 1.35 |
| 343.15 | 377 | 34.8 (0.26)     | 136.4 (0.74) | 2.07 |
|        | 480 | 34.8 (1.00)     | 136.4 (0.00) | 1.33 |
| 353.15 | 377 | 31.1 (0.24)     | 130.6 (0.76) | 2.13 |
|        | 480 | 31.1 (1.00)     | 130.6 (0.00) | 1.33 |
| 363.15 | 377 | 27.6 (0.24)     | 125.3 (0.76) | 2.02 |
|        | 480 | 27.6 (1.00)     | 125.3 (0.00) | 1.19 |
|        |     | <b>PDMS2000</b> |              |      |
| 293.15 | 377 | 3.2 (0.12)      | 22.8 (0.88)  | 1.72 |
|        | 480 | 3.2 (-0.46)     | 22.8 (0.54)  | 2.29 |
| 303.15 | 377 | 2.8 (0.16)      | 21.0 (0.84)  | 1.79 |
|        | 480 | 2.8 (-0.46)     | 21.0 (0.54)  | 2.58 |
| 313.15 | 377 | 2.9 (0.17)      | 19.3 (0.83)  | 1.63 |
|        | 480 | 2.9 (-0.45)     | 19.3 (0.55)  | 2.57 |
| 323.15 | 377 | 3.1 (0.19)      | 17.8 (0.81)  | 1.71 |
|        | 480 | 3.1 (-0.44)     | 17.8 (0.56)  | 2.57 |
| 333.15 | 377 | 3.6 (0.21)      | 16.1 (0.79)  | 1.64 |
|        | 480 | 3.6 (-0.43)     | 16.1 (0.57)  | 2.55 |
| 343.15 | 377 | 3.6 (0.20)      | 14.6 (0.80)  | 1.69 |
|        | 480 | 3.6 (-0.43)     | 14.6 (0.57)  | 2.51 |
| 353.15 | 377 | 3.3 (0.19)      | 13.2 (0.81)  | 1.36 |
|        | 480 | 3.3 (-0.42)     | 13.2 (0.58)  | 2.08 |
| 363.15 | 377 | 3.2 (0.21)      | 12.0 (0.79)  | 1.47 |
|        | 480 | 3.2 (-0.41)     | 12.0 (0.59)  | 1.95 |

---



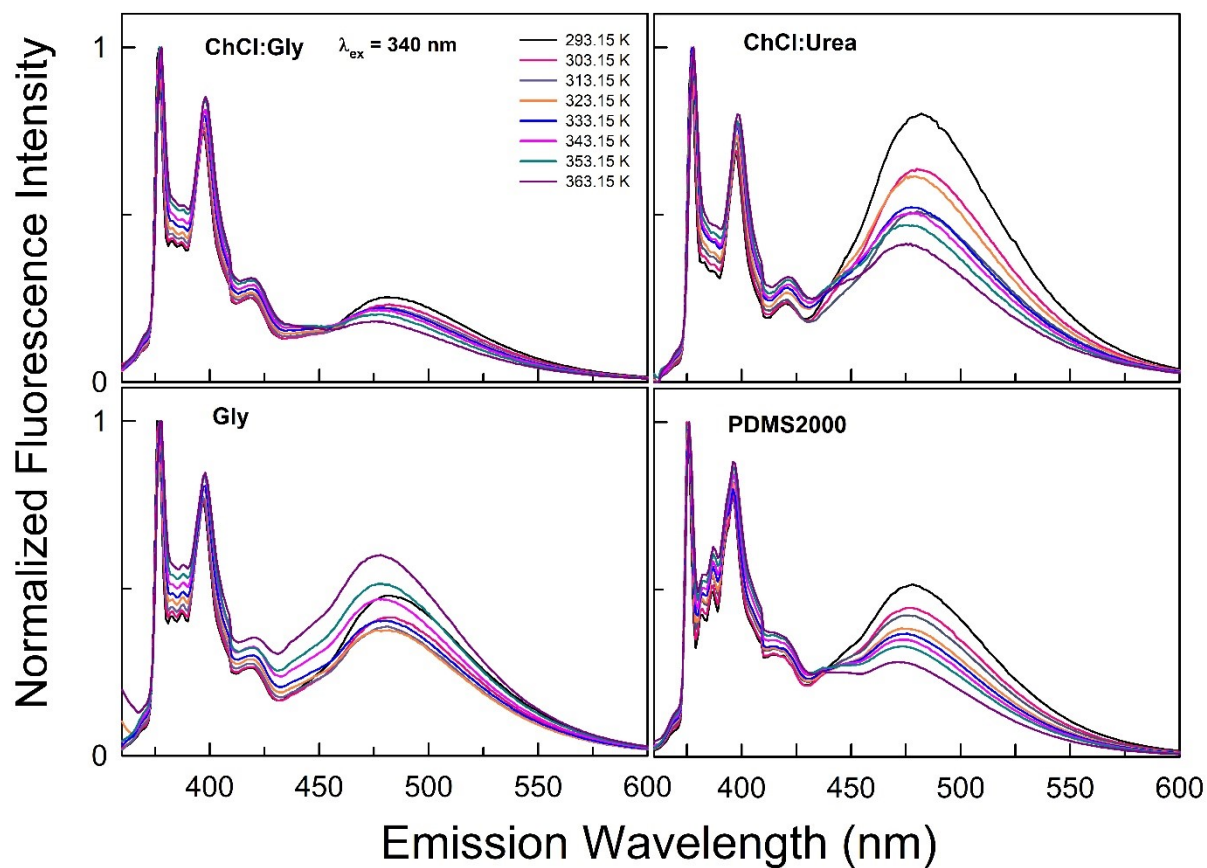

**Fig. S1:** Normalized steady-state fluorescence emission spectra [ $\lambda_{\text{exc}} = 340$  nm (Xe arc lamp); excitation and emission slits are 1 and 1 nm, respectively] of Py-PDMS-Py (10  $\mu\text{M}$ ) dissolved in DESs ChCl:Gly and ChCl:Urea, glycerol (Gly) and PDMS2000 at different temperatures.

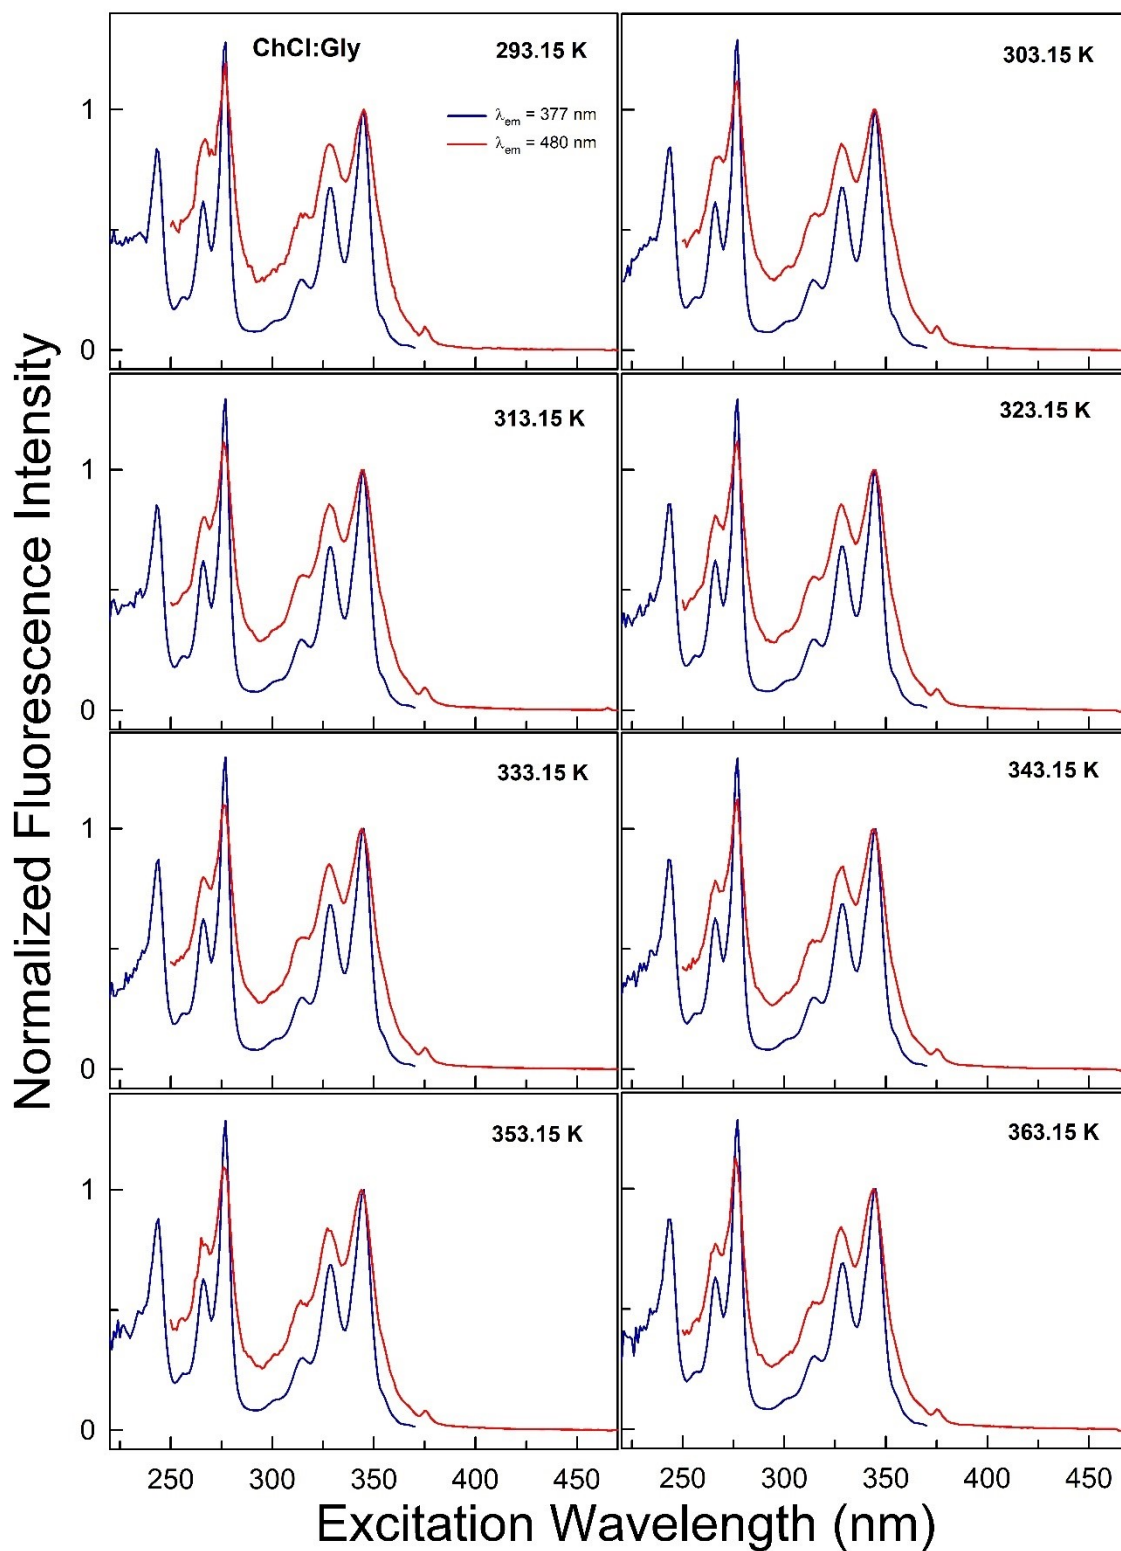

**Fig. S2:** Normalized emission wavelength-dependent fluorescence excitation spectra of Py-PDMS-Py (10  $\mu\text{M}$ ) dissolved in DES ChCl:Gly recorded while monitoring the emission at 377 nm and 480 nm [emission and excitation slits are 1 and 1 nm, respectively] at different temperatures.

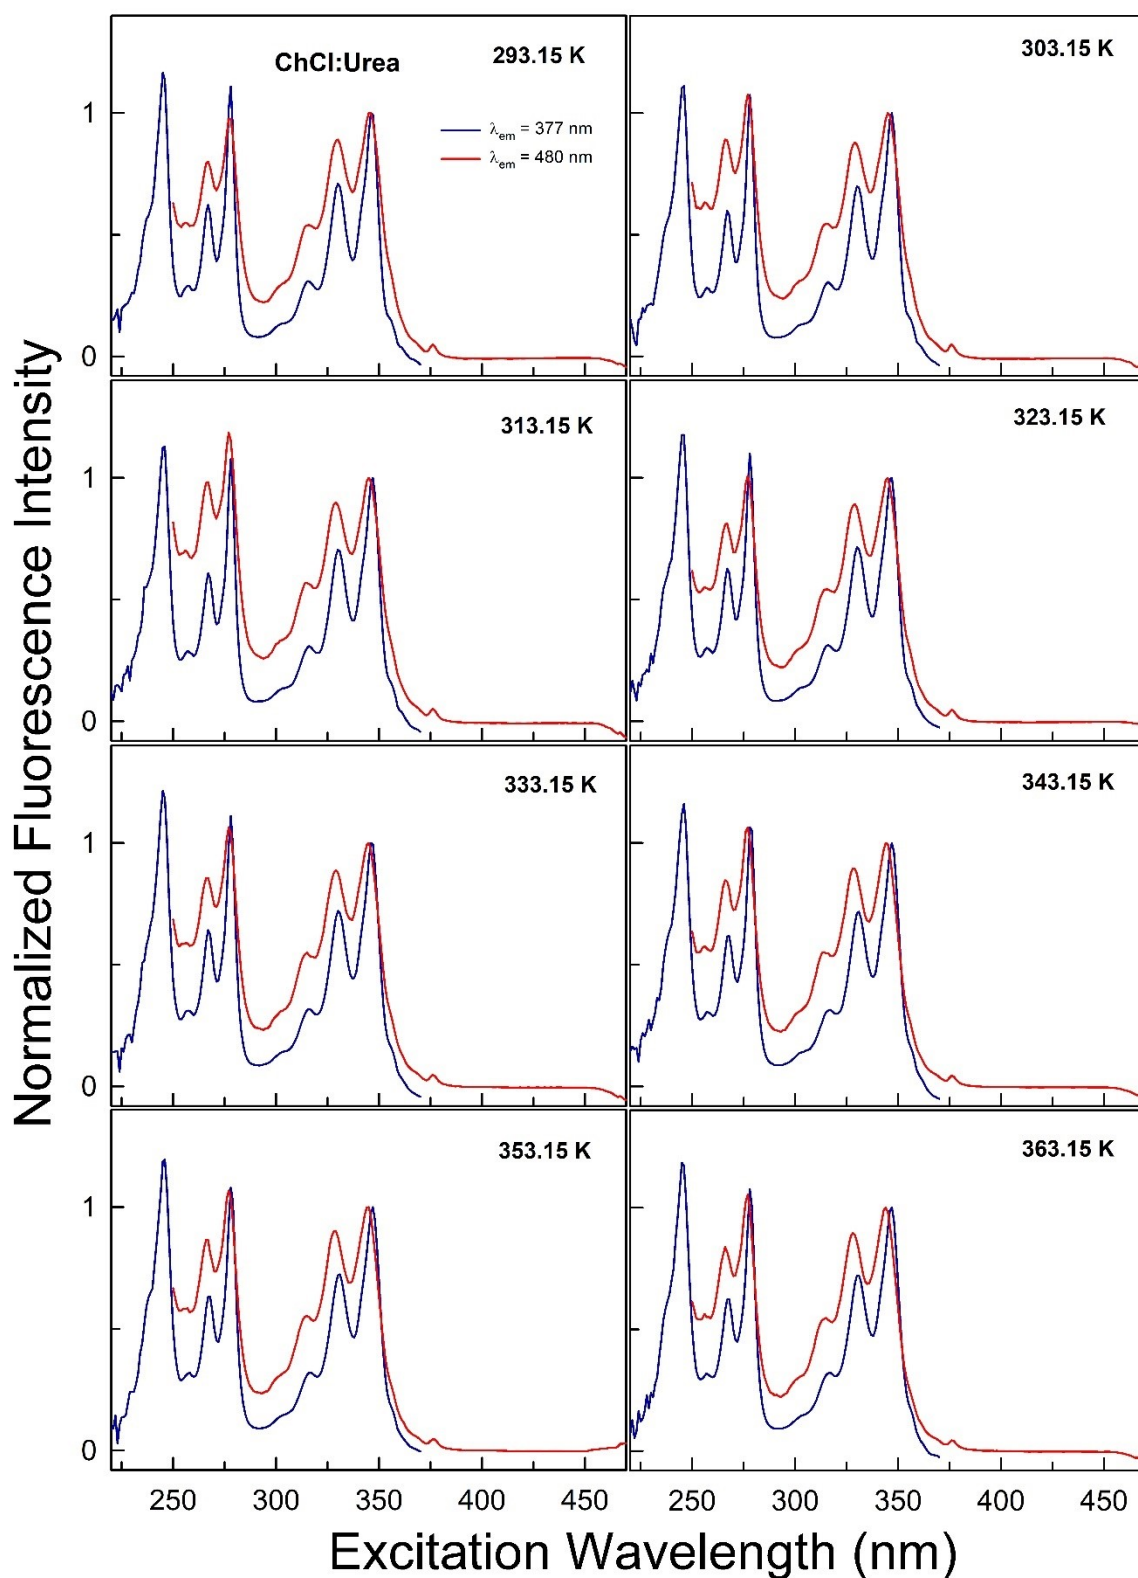

**Fig. S3:** Normalized emission wavelength-dependent fluorescence excitation spectra of Py-PDMS-Py (10  $\mu$ M) dissolved in DES ChCl:Urea recorded while monitoring the emission at 377 nm and 480 nm [emission and excitation slits are 1 and 1 nm, respectively] at different temperatures.

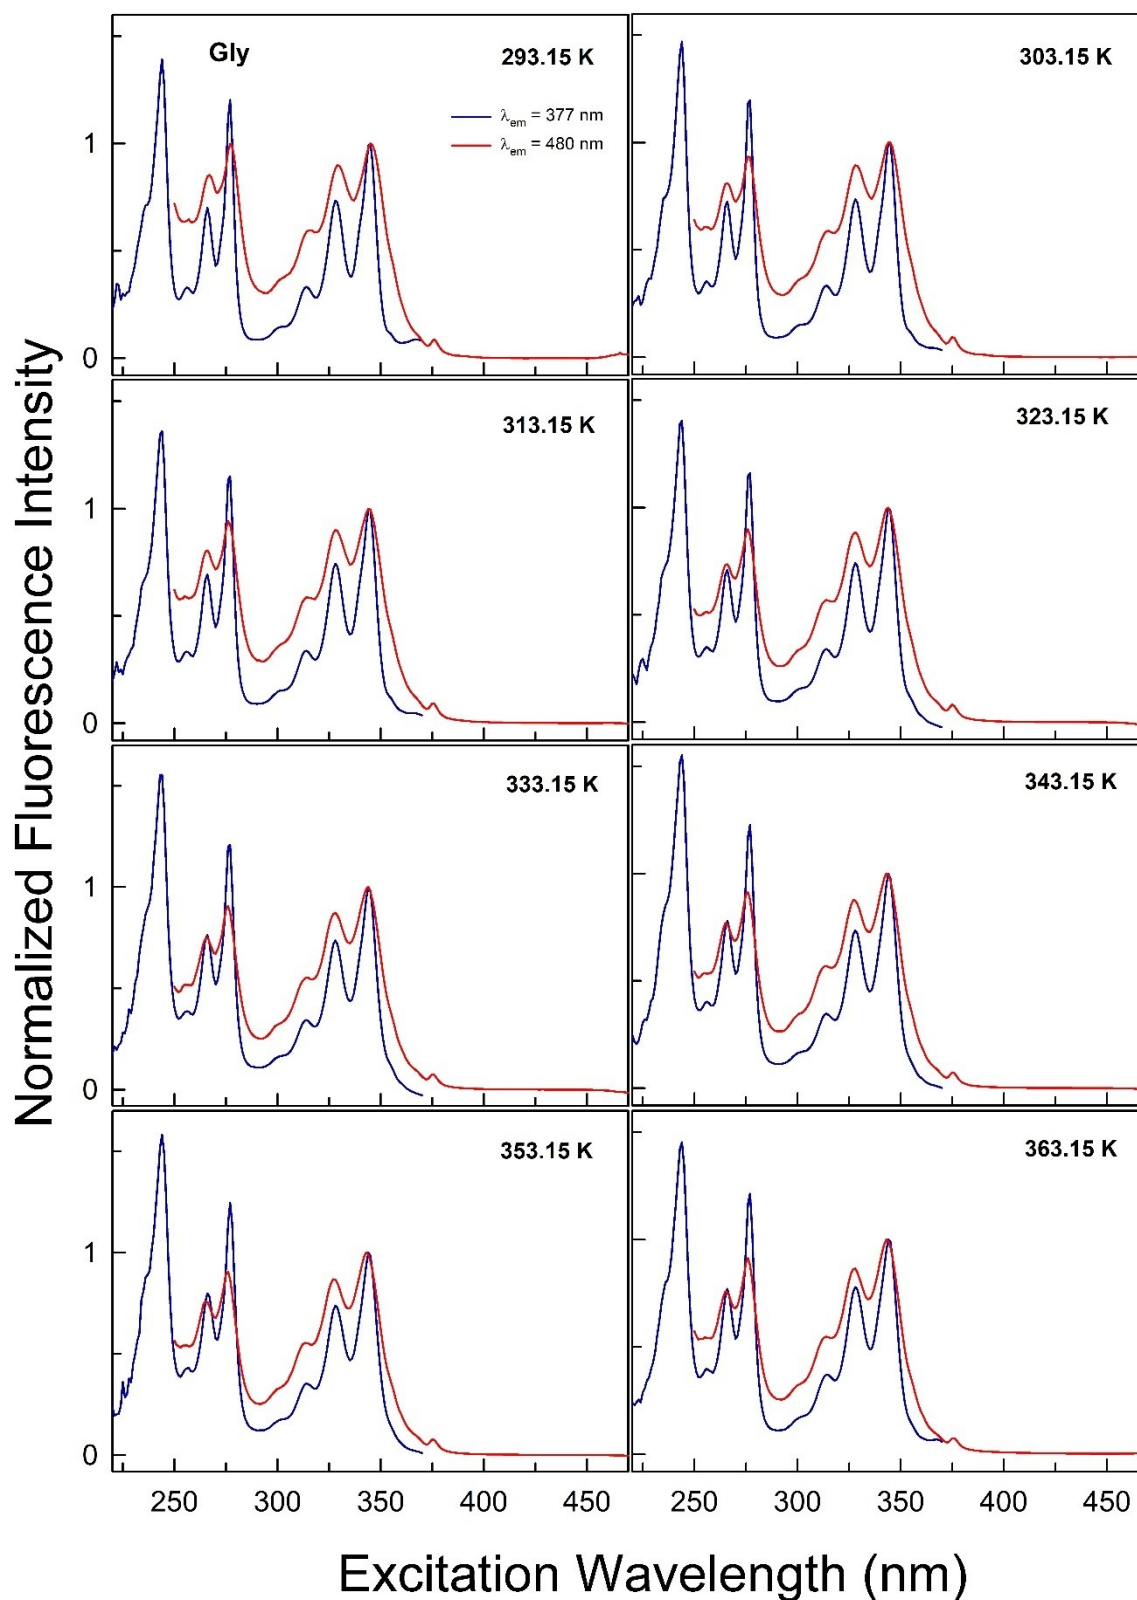

**Fig. S4:** Normalized emission wavelength-dependent fluorescence excitation spectra of Py-PDMS-Py (10  $\mu$ M) dissolved in glycerol (Gly) recorded while monitoring the emission at 377 nm and 480 nm [emission and excitation slits are 1 and 1 nm, respectively] at different temperatures.

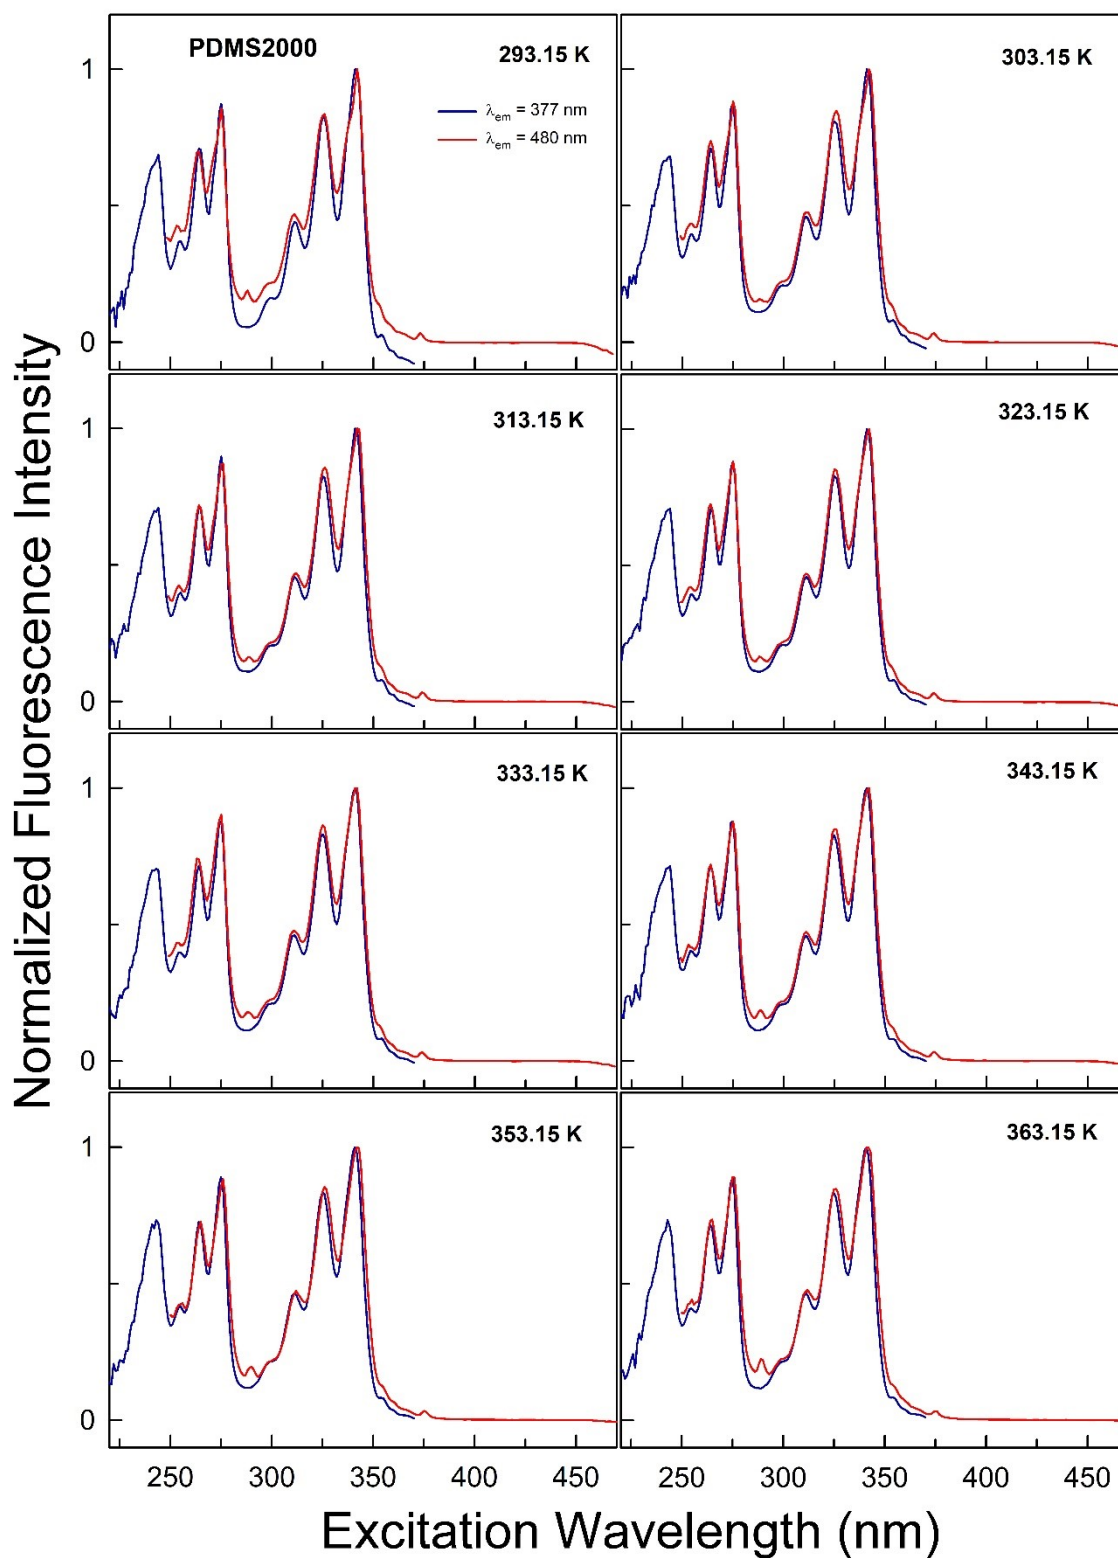

**Fig. S5:** Normalized emission wavelength-dependent fluorescence excitation spectra of Py-PDMS-Py (10  $\mu\text{M}$ ) dissolved in PDMS2000 recorded while monitoring the emission at 377 nm and 480 nm [emission and excitation slits are 1 and 1 nm, respectively] at different temperatures.
